# Supplementary material for: Angiopoietin-like 3 monomers are abundant in human plasma but areunable to inhibit endothelial lipase
Source: JCI journal article supplement (doi:10.1172/jci.insight.197827), 2025-10-28
Supplement: sd1 [file 1]

# **Angiopoietin-like 3 monomers are abundant in human plasma but are unable to inhibit endothelial lipase**

**Sydney G. Walker<sup>1</sup>, Yan Q. Chen<sup>2</sup>, Kelli L. Sylvers-Davie<sup>1</sup>, Alex Dou<sup>1</sup>, Eugene Y. Zhen<sup>2</sup>, Yuewei Qian<sup>2</sup>, Yi Wen<sup>2</sup>, Mariam Ehsani<sup>2</sup>, Sydney Smith<sup>2</sup>, Rakshya Thapa<sup>1,3</sup>, Maxwell J. Mercer<sup>1</sup>, Lucy Langmack<sup>1</sup>, Bharat Raj Bhattarai<sup>1,3</sup>, Michael Ploug<sup>4,5</sup>, Robert J. Konrad<sup>2</sup>, Brandon S. J. Davies<sup>1,\*</sup>**

<sup>1</sup> Department of Biochemistry and Molecular Biology, Fraternal Order of Eagles Diabetes Research Center, and Obesity Research and Education Initiative, University of Iowa, Iowa City, IA 52242. <sup>2</sup> Lilly Research Laboratories, Eli Lilly and Company, Indianapolis, IN 46285. <sup>3</sup> Department of Chemistry, Waldorf University, Forest City, IA 50436. <sup>4</sup>Finsen Laboratory, Copenhagen University Hospital-Rigshospitalet, DK-2200 Copenhagen N, Denmark; <sup>5</sup>Finsen Laboratory, Biotech Research and Innovation Centre, University of Copenhagen, DK-2200 Copenhagen N, Denmark

\*Address Correspondence to: Brandon S. J. Davies, Department of Biochemistry and Molecular Biology, University of Iowa, 169 Newton Rd., PBDB 3326, Iowa City, IA, 52242. Tel.: 319-335-3225; Fax: 319-335-9570; E-mail: [brandon-davies@uiowa.edu](mailto:brandon-davies@uiowa.edu).

**Supplemental Table 1. Inhibitory activity and trimerization of ANGPTL3 mutants**

| mutant    | % inh | % tri | mutant      | % inh | % tri | mutant      | % inh | % tri |
|-----------|-------|-------|-------------|-------|-------|-------------|-------|-------|
| S17A-R18A | 73    | 100   | S86A-L87A   | 95    | 100   | Q156A-E157A | 100   | 80    |
| V19A-D20A | 102   | 100   | R88A-T89A   | 87    | 90    | H158A-P159A | 94    | 100   |
| P21A-D22A | 96    | 100   | N90A-E91A   | 91    | 100   | E160A-V161A | 72    | 50    |
| L23A-S24A | 100   | 90    | I92A-K93A   | 6     | 30    | T162A-S163A | 102   | 80    |
| S25A-F26A | 105   | 100   | E94A-E95A   | 119   | 90    | L164A-K165A | 37    | 0     |
| D27A-D28A | 84    | 90    | E96A-K97A   | 149   | 90    | S166A-F167A | ND    | ND    |
| P30A-S31A | 105   | 100   | E98A-L99A   | -10   | 10    | V168A-E169A | 70    | 60    |
| E32A-P33A | 104   | 90    | R100A-R101A | 21    | 50    | Q170A-Q171A | 88    | 70    |
| K34A-S35A | 122   | 100   | T102A-T103A | 81    | 90    | D172A-N173A | 108   | 80    |
| R36A-F37A | 10    | 80    | S104A-T105A | 105   | 100   | S174A-I175A | 30    | 20    |
| M39A-L40A | ND    | ND    | L106A-Q107A | -2    | 20    | R176A-E177A | 103   | 80    |
| D41A-D42A | 26    | 70    | V108A-K109A | 107   | 90    | L178A-L179A | 54    | 70    |
| V43A-K44A | 36    | 100   | N110A-E111A | 92    | 100   | Q180A-S181A | 105   | 80    |
| I45A-L46A | 11    | 90    | E112A-V113A | -27   | 10    | V182A-E183A | 98    | 90    |
| N48A-G49A | 52    | 80    | K114A-N115A | 108   | 100   | E184A-Q185A | 115   | 90    |
| L50A-L51A | -6    | 60    | M116A-S117A | 40    | 60    | Y186A-K187A | 100   | 90    |
| Q52A-L53A | 9     | 30    | V118A-E119A | 111   | 90    | Q188A-L189A | 34    | 0     |
| G54A-H55A | 28    | 90    | L120A-N121A | ND    | ND    | S190A-Q191A | 86    | 90    |
| G56A-L57A | 22    | 90    | S122A-K123A | 56    | 60    | Q192A-H193A | 76    | 50    |
| K58A-D59A | 88    | 70    | L124A-E125A | 6     | 10    | M194A-Q195A | 117   | 90    |
| F60A-V61A | 21    | 30    | S126A-L127A | 39    | 0     | I196A-K197A | 75    | 50    |
| H62A-K63A | 45    | 80    | L128A-E129A | 91    | 90    | E198A-I199A | 33    | 20    |
| T64A-K65A | 20    | 50    | E130A-K131A | 27    | 20    | E200A-K201A | 102   | 80    |
| G66A-Q67A | 86    | 90    | T132A-L134A | 8     | 30    | Q202A-L203A | 1     | 40    |
| I68A-N69A | 4     | 40    | Q135A-H136A | 94    | 90    | R204A-K205A | 104   | 80    |
| D70A-I71A | 3     | 20    | K137A-V138A | -4    | 0     | T206A-G207A | 95    | 90    |
| F72A-Q73A | 62    | 40    | R139A-L141A | -2    | 20    | I208A-Q209A | 99    | 90    |
| K74A-L75A | 11    | 40    | E142A-E143A | 11    | 30    | E210A-P211A | 97    | 80    |
| N76A-I77A | 87    | 100   | Q144A-L145A | 19    | 30    | S212A-E213A | 96    | 90    |
| F78A-D79A | 22    | 60    | T146A-N147A | 104   | 90    | N214A-S215A | 92    | 90    |
| Q80A-S81A | 122   | 100   | L148A-I149A | 88    | 70    | L216A-S217A | 116   | 90    |
| F82A-Y83A | 5     | 30    | L150A-S151A | 90    | 100   | S218A-K219A | 112   | 60    |
| D84A-L85A | 11    | 0     | P152A-G154A | 87    | 90    | S220A-R221A | 100   | 100   |

**Levels of EL inhibition (% inh) and trimerization (% tri) of each ANGPTL3 mutant as compared to wild-type ANGPTL3. ND = not determined**

## Supplemental Figure 1

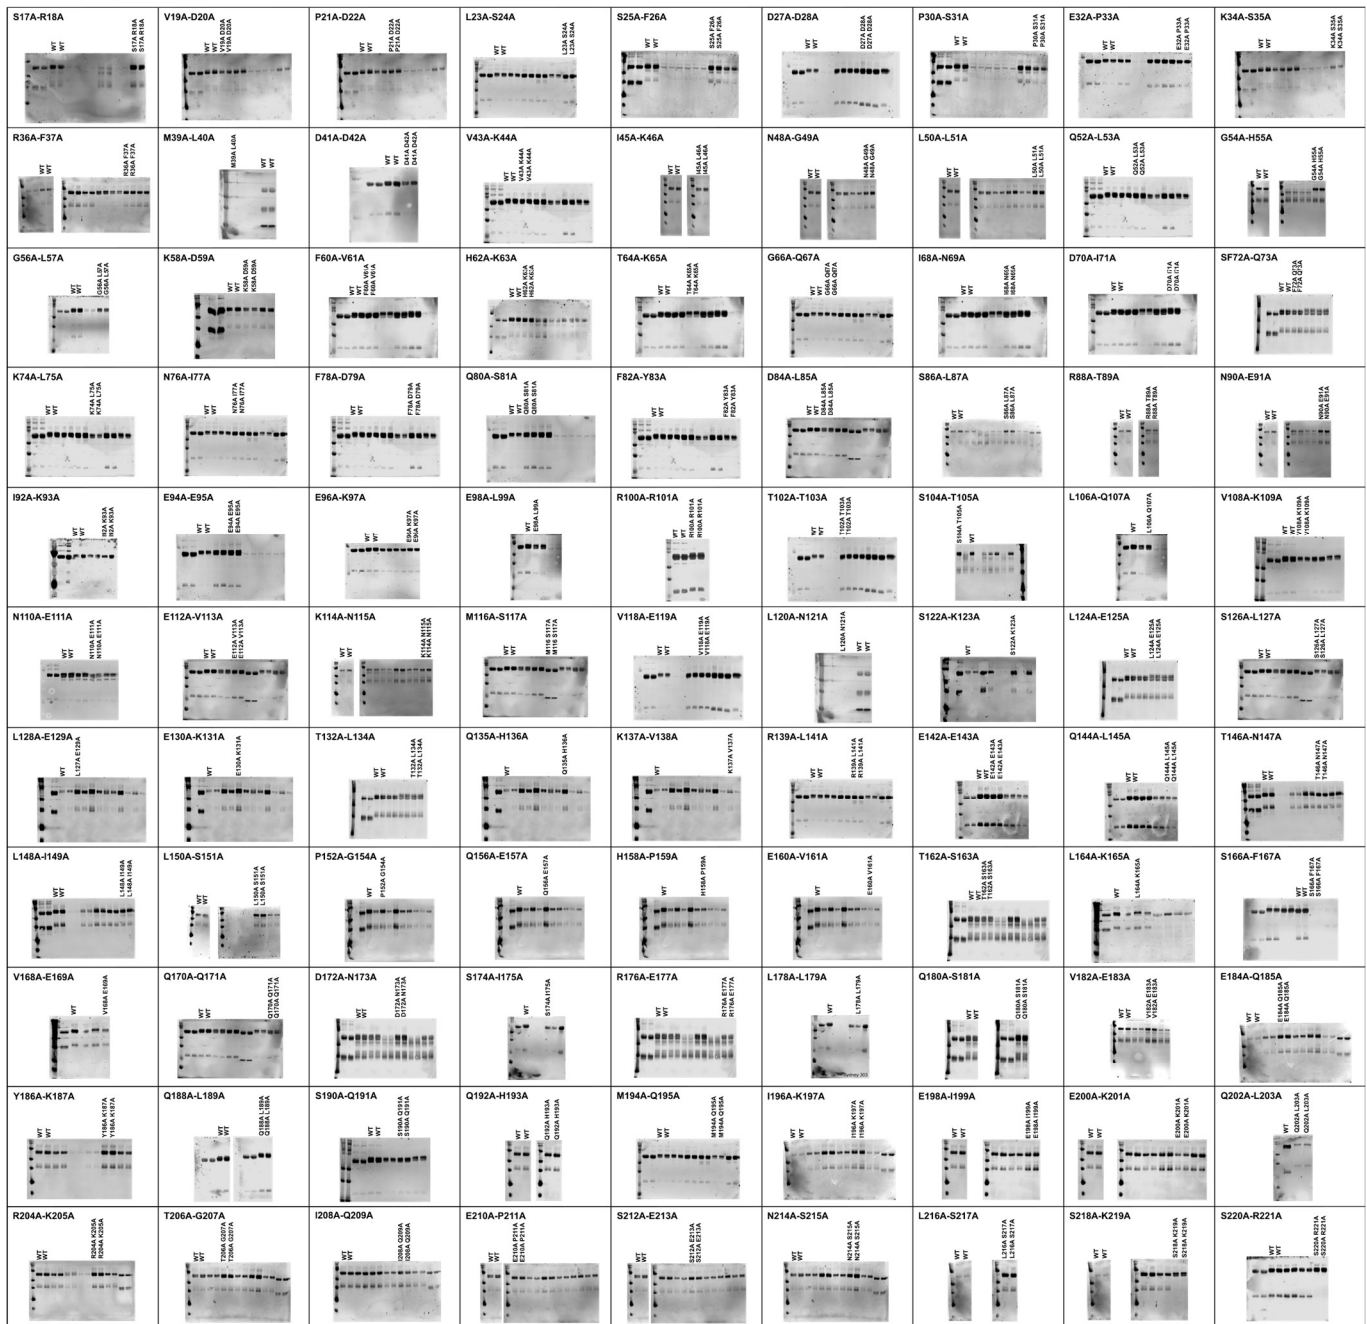

**Supplemental Figure 1: Protein expression of ANGPTL3 mutants.** Western blots of conditioned media expressing either wild-type or mutant protein.

Supplemental Figure 2

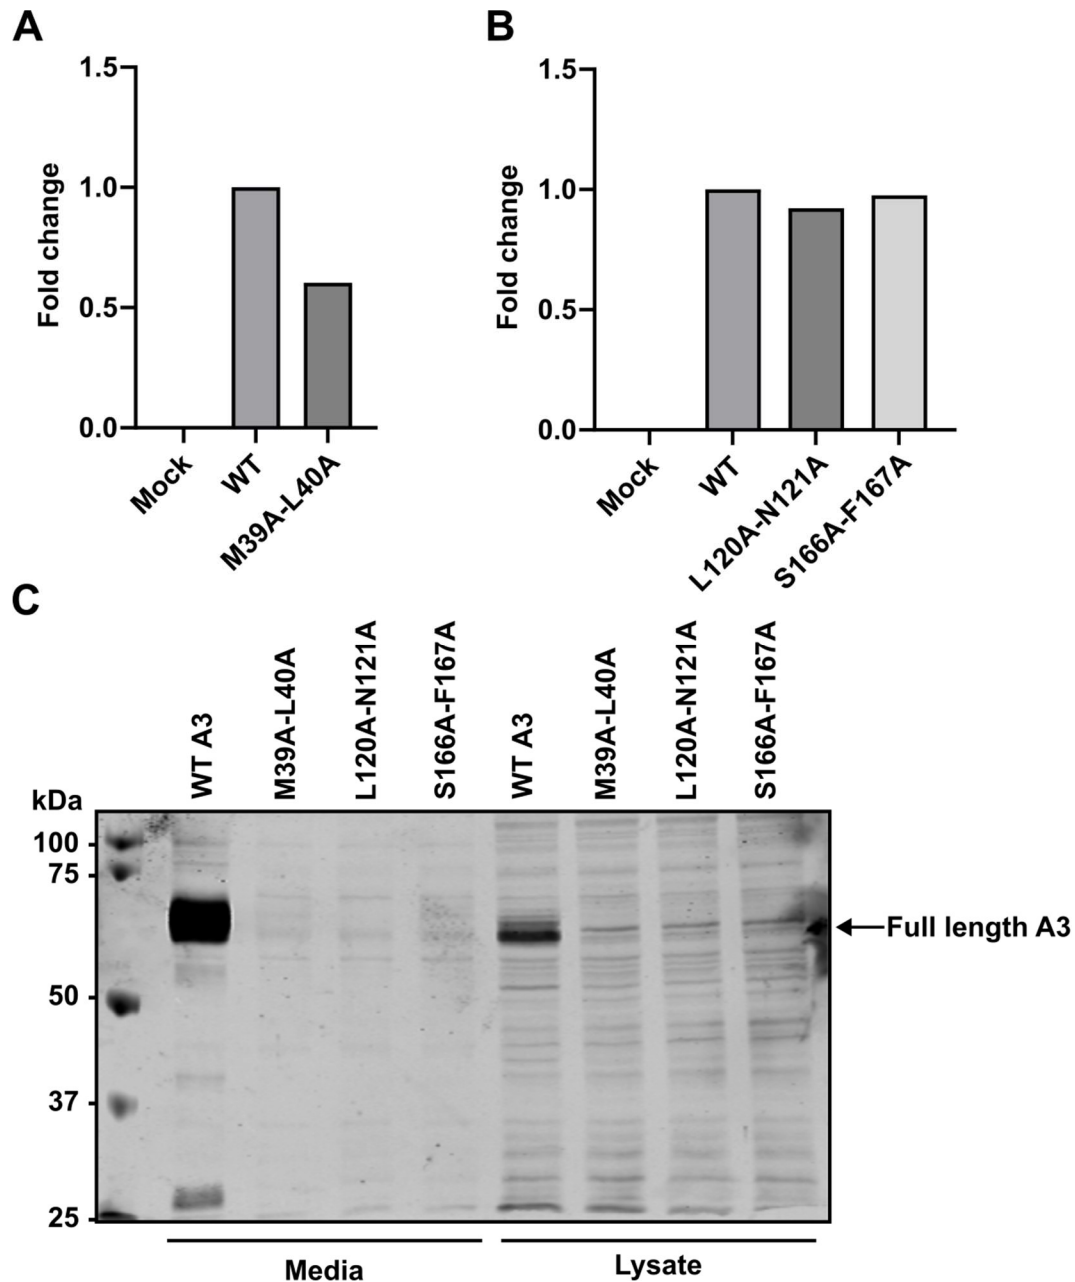

**Supplemental Figure 2: ANGPTL3 mutants M39A-L40A, L120A-N121A, and S166A-F167A do not produce viable protein. (A-B)** mRNA expression of *Angptl3* in cells transiently transfected with constructs expressing either wild-type or the indicated mutant ANGPTL3 as measured by qPCR. Bars represent the fold change in expression compared to wild-type ANGPTL3-transfected cells. **(C)** Western blot of media and cell lysates from cells transiently transfected with wild-type or the indicated mutant ANGPTL3.

## Supplemental Figure 3

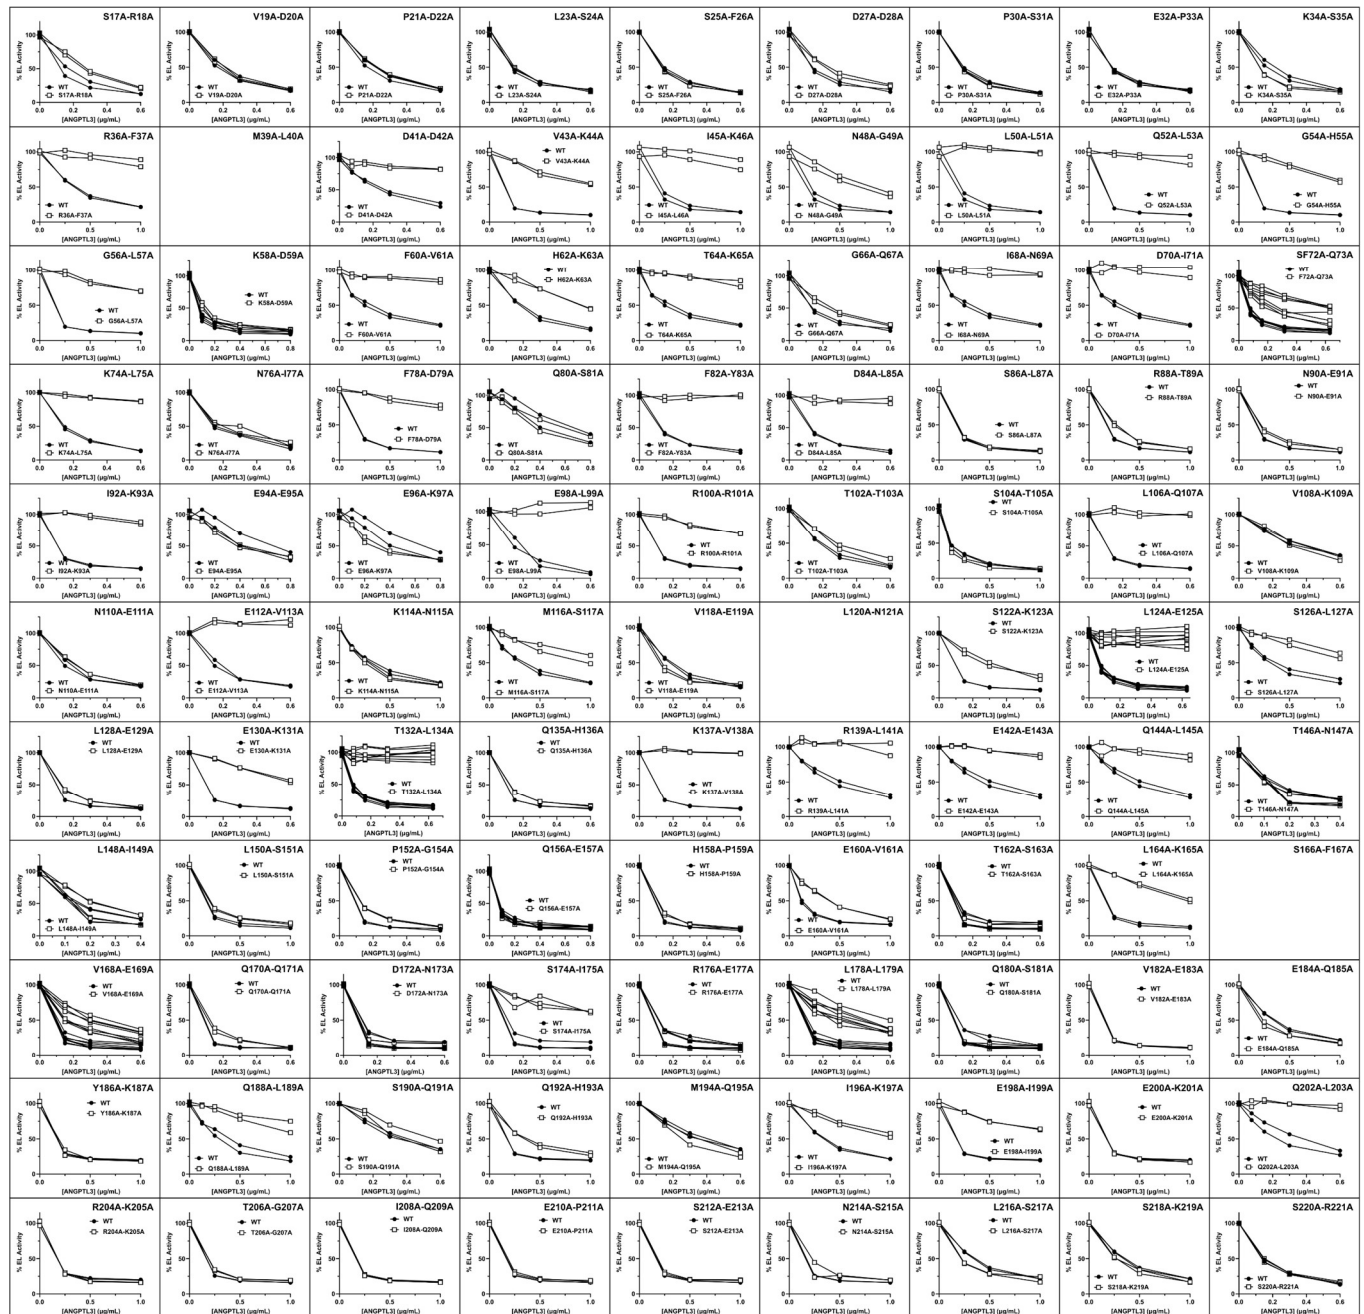

**Supplemental Figure 3: EL inhibition by ANGPTL3 mutants.** Increasing concentrations of wild-type ANGPTL3 or the indicated ANGPTL3 mutant were incubated with EL for 30 minutes at 37°C. The phospholipase activity of EL was measured using a fluorescence-based phospholipase assay. Points of each line represent the data of an individual replicate. For each graph, the activity was normalized to the control treated with EL and 0 μg/ml ANGPTL3. Mutants tested simultaneously used the same WT control.

Supplemental Figure 4

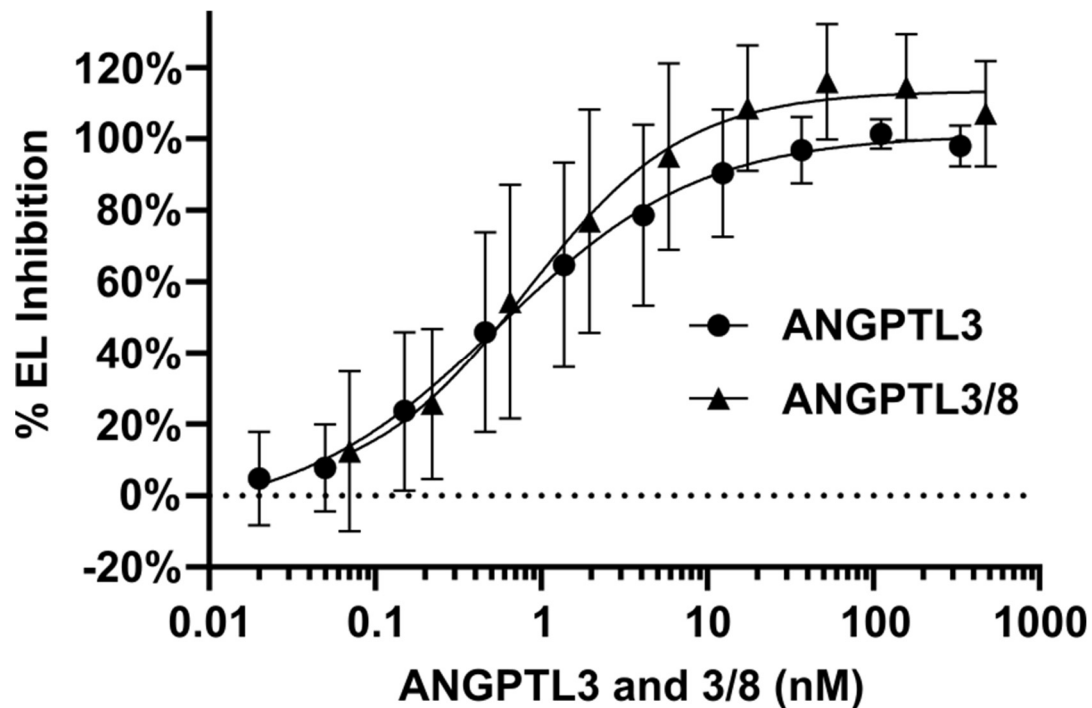

**Supplemental Figure 4: ANGPTL3 and ANGPTL3/8 inhibition of EL.** The ability of ANGPTL3 or ANGPTL3/8 to inhibit EL at 37°C was assessed using an EL stable expression cell line and phospholipase A1 selective substrate. Fluorescence was monitored with an excitation wavelength of 485 nm and an emission wavelength of 516 nm. Readings were taken at 1 and 30 min, with the 1-minute reading subtracted from the 30-minute reading to correct for background fluorescence. Results are shown as the mean  $\pm$  SD ( $n=8-10$ ) from three independent experiments for ANGPTL3 and four independent experiments for ANGPTL3/8.

## Supplemental Figure 5

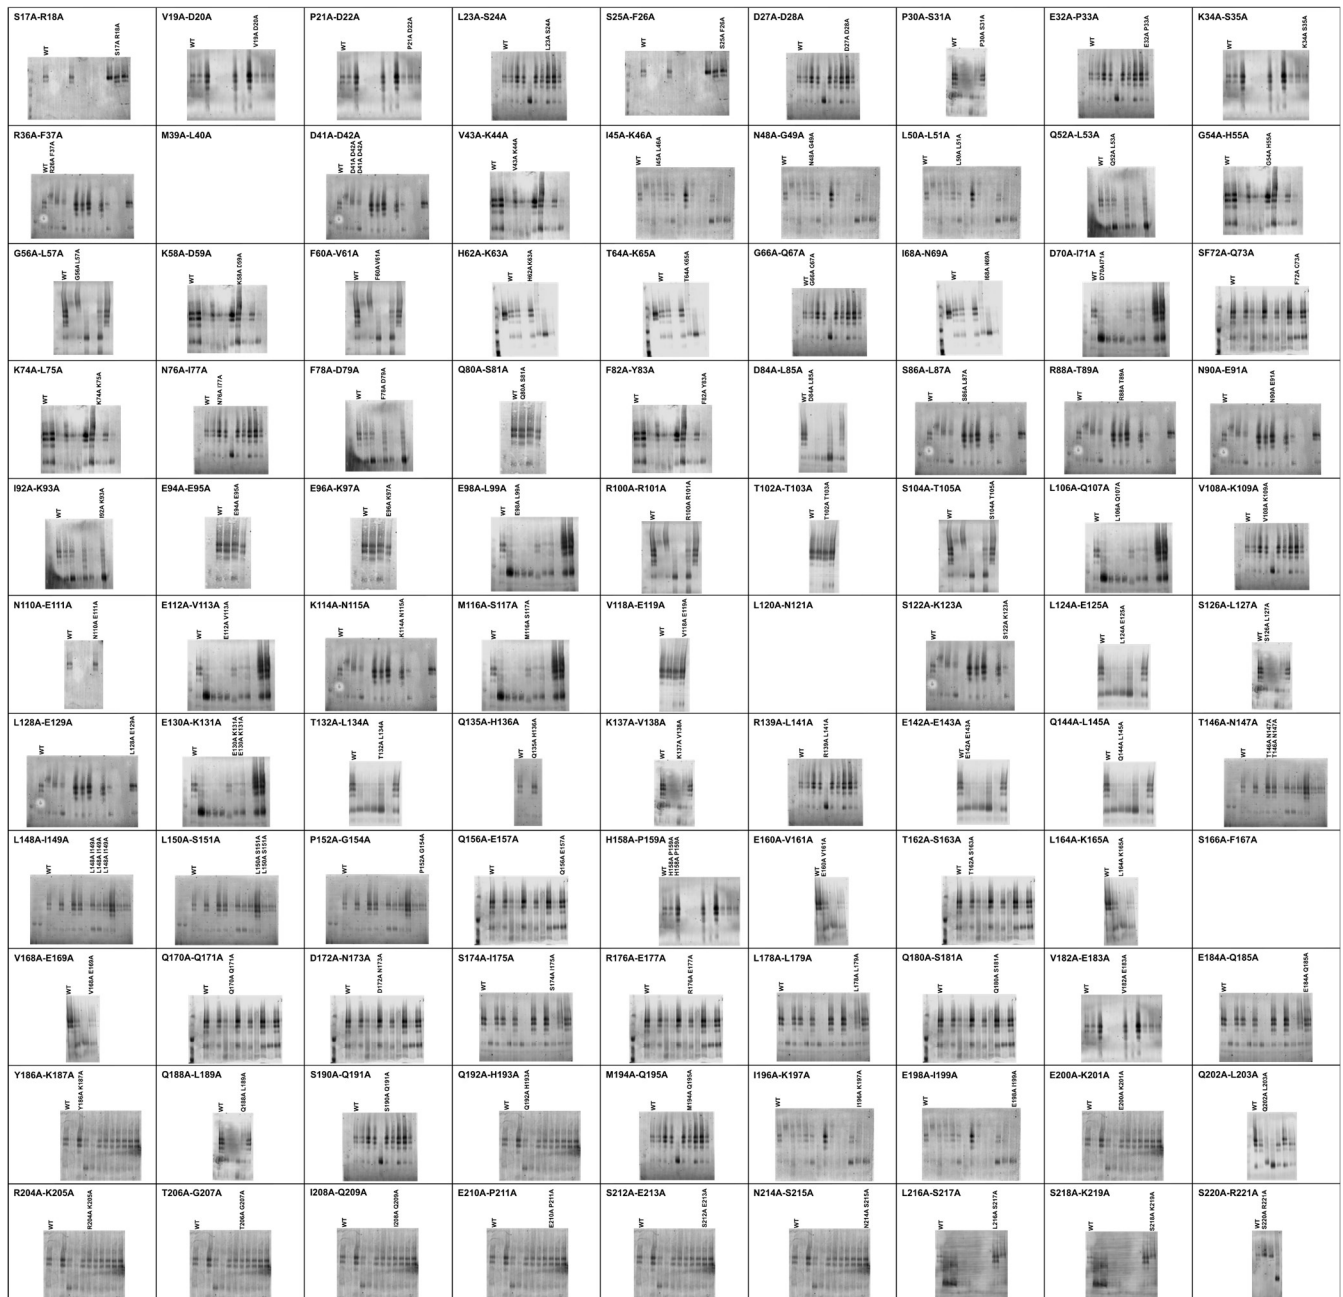

**Supplemental Figure 5: Oligomerization of ANGPTL3 mutants.** Blue nativePAGE gel electrophoresis followed by immunoblotting of wild-type or the indicated ANGPTL3 mutant.

## Supplemental Figure 6

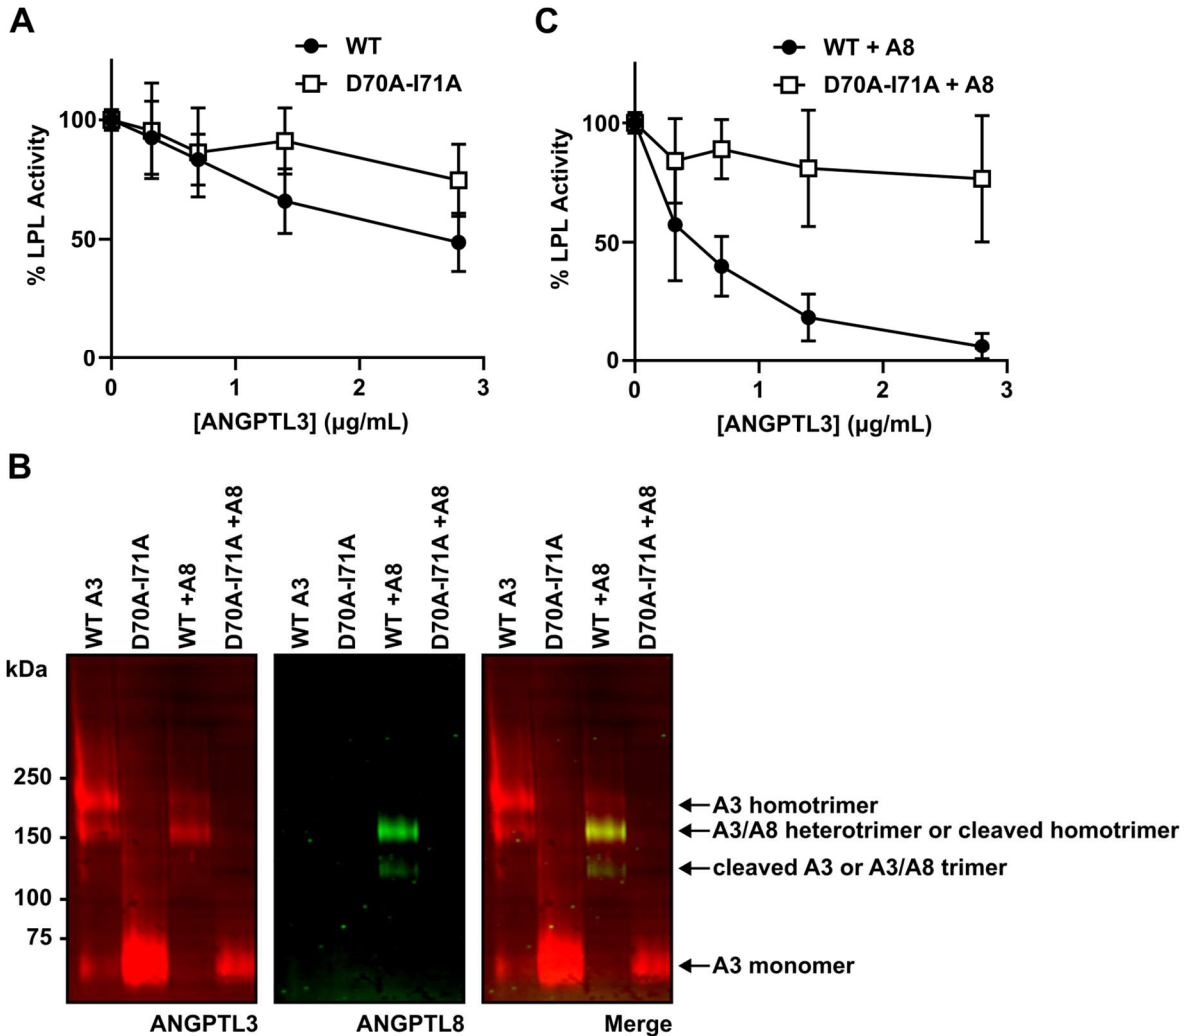

**Supplemental Figure 6: Inhibition of LPL by mutant ANGPTL3.** **(A)** Triglyceride lipase activity of LPL after incubation with the indicated concentrations of wild-type ANGPTL3 or ANGPTL3 D70A-I71A. LPL and ANGPTL3 were incubated for 30 minutes at 37°C and then triglyceride activity was measured using a fluorescence-based assay. Points represent the mean ( $\pm$ SD) of three independent experiments performed in duplicate. For each graph, the activity was normalized to the control treated with LPL and 0  $\mu$ g/ml ANGPTL3. **(B)** Conditioned media containing wild-type and mutant mouse ANGPTL3 expressed with and without ANGPTL8 (A8) were run on blue nativePAGE gels and blotted for ANGPTL3 (red) and ANGPTL8 (green). **(C)** Triglyceride lipase activity of LPL after incubation with the indicated concentrations of wild-type ANGPTL3 or ANGPTL3 D70A-I71A, both co-expressed with ANGPTL8. LPL and ANGPTL3/8 were incubated for 30 minutes at 37°C and then triglyceride activity was measured using a fluorescence-based assay. Points represent the mean  $\pm$  SD of three independent experiments performed in duplicate. For each graph, the activity was normalized to the control treated with LPL and 0  $\mu$ g/ml ANGPTL3/8.
